# Supplementary material for: Complex regulation of Eomes levels mediated through distinct functional features of the Meteor long non-coding RNA locus
Source: PubMed Central journal article supplement — Cell Rep. 2023 May 31;42(6):112569. doi: 10.1016/j.celrep.2023.112569 (PMC10320833; doi:10.1016/j.celrep.2023.112569), 2023-05-31
Supplement: mmc1.pdf [file mmc1.pdf]

Cell Reports, Volume 42

**Supplemental information**

**Complex regulation of *Eomes* levels  
mediated through distinct functional features  
of the *Meteor* long non-coding RNA locus**

**Noa Gil, Rotem Ben-Tov Perry, Zohar Mukamel, Alex Tuck, Marc Bühler, and Igor Ulitsky**

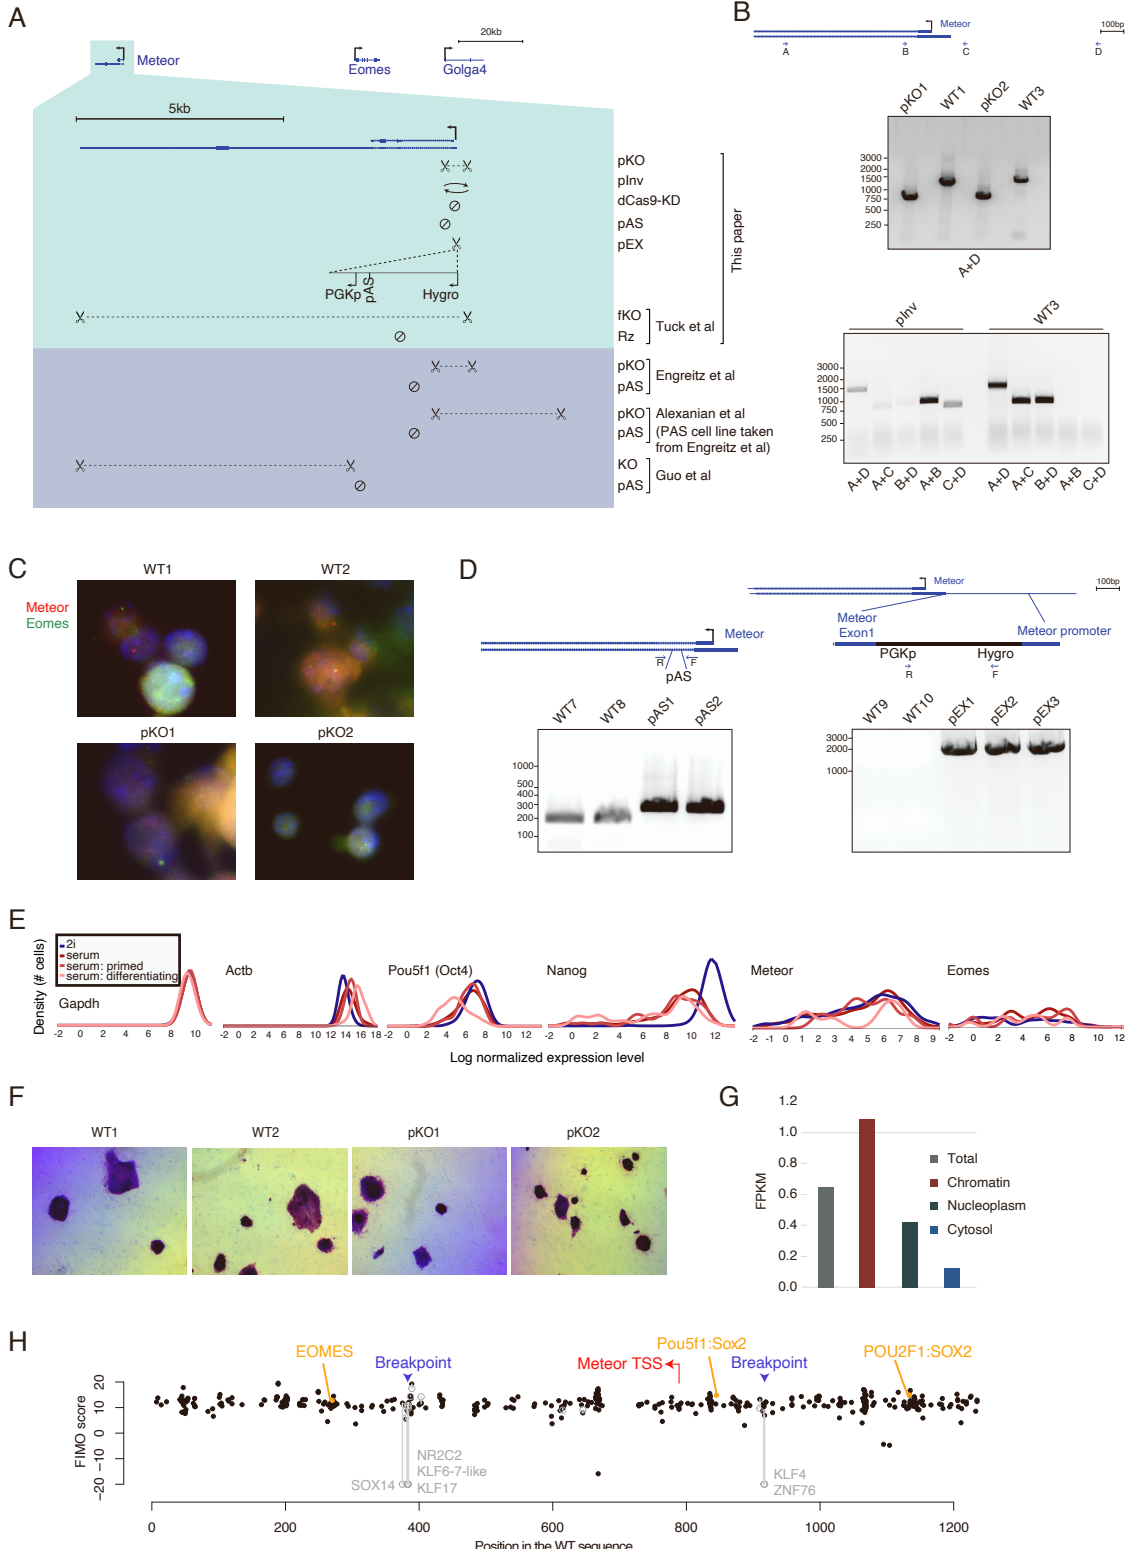

**Figure S1. Perturbations to the *Meteor* locus. Related to Figure 1.**

**A.** (Top) same as Figure 1A, and (bottom) additional genomic perturbations described in the indicated papers [S1–4] for deleting regions in the *Meteor* locus (KO) or introducing polyadenylation sites (pAS). **B.** Schematic locations and directionalities of the primers used to probe genomic deletions in the *Meteor* locus (top), and the resulting PCR products (bottom). PCR was performed on the indicated cell lines using the primers indicated below the blots (see **Method Details** and **Table S1**). PCR using primers B and C was performed on DNA pre-amplified with primers A and D. **C.** Single molecule FISH using probes against *Meteor* (red) and *Eomes* (green) as well as DAPI staining (blue) in WT and *Meteor* pKO cells grown in 2i conditions, imaged using 100X objectives. No *Meteor* signal was detected in the pKO lines. **D.** Same as (B), for genotyping pAS insertions (left) and pEX clones (right). PCR was performed on the indicated cell lines using the primers listed in **Table S1**. **E.** Density plots of expression levels of the indicated genes in the indicated cell populations visualized through the ESpresso database [S5]. **F.** AP staining for the pluripotent state of pKO clones. **G.** Expression levels of *Meteor* in the indicated compartment of mESCs. Data taken from GEO dataset GSE99366. **H.** Predicted binding scores for TF binding sites (TFBS) defined in the JASPAR database [S6] in the WT and pInv sequence surrounding the *Meteor* TSS. The position of the TSS and the positions of the inversion breakpoints are shown by vertical lines. For each TFBS, the position with the highest score in the WT sequence is denoted by a black dot and shown at the position of the top-scoring hit in the WT sequence. For TFBSs for which the score in the inverted sequence is different, a gray point indicates the highest score in the inverted sequence, and the gray lines connect the scores in the WT and the inverted sequences. Scores below  $-20$  were set to  $-20$ . Names of TFBSs for which the scores were below  $-20$  in the inverted sequence are shown in gray. Scores for the pluripotency TFs and for EOMES are denoted in orange.

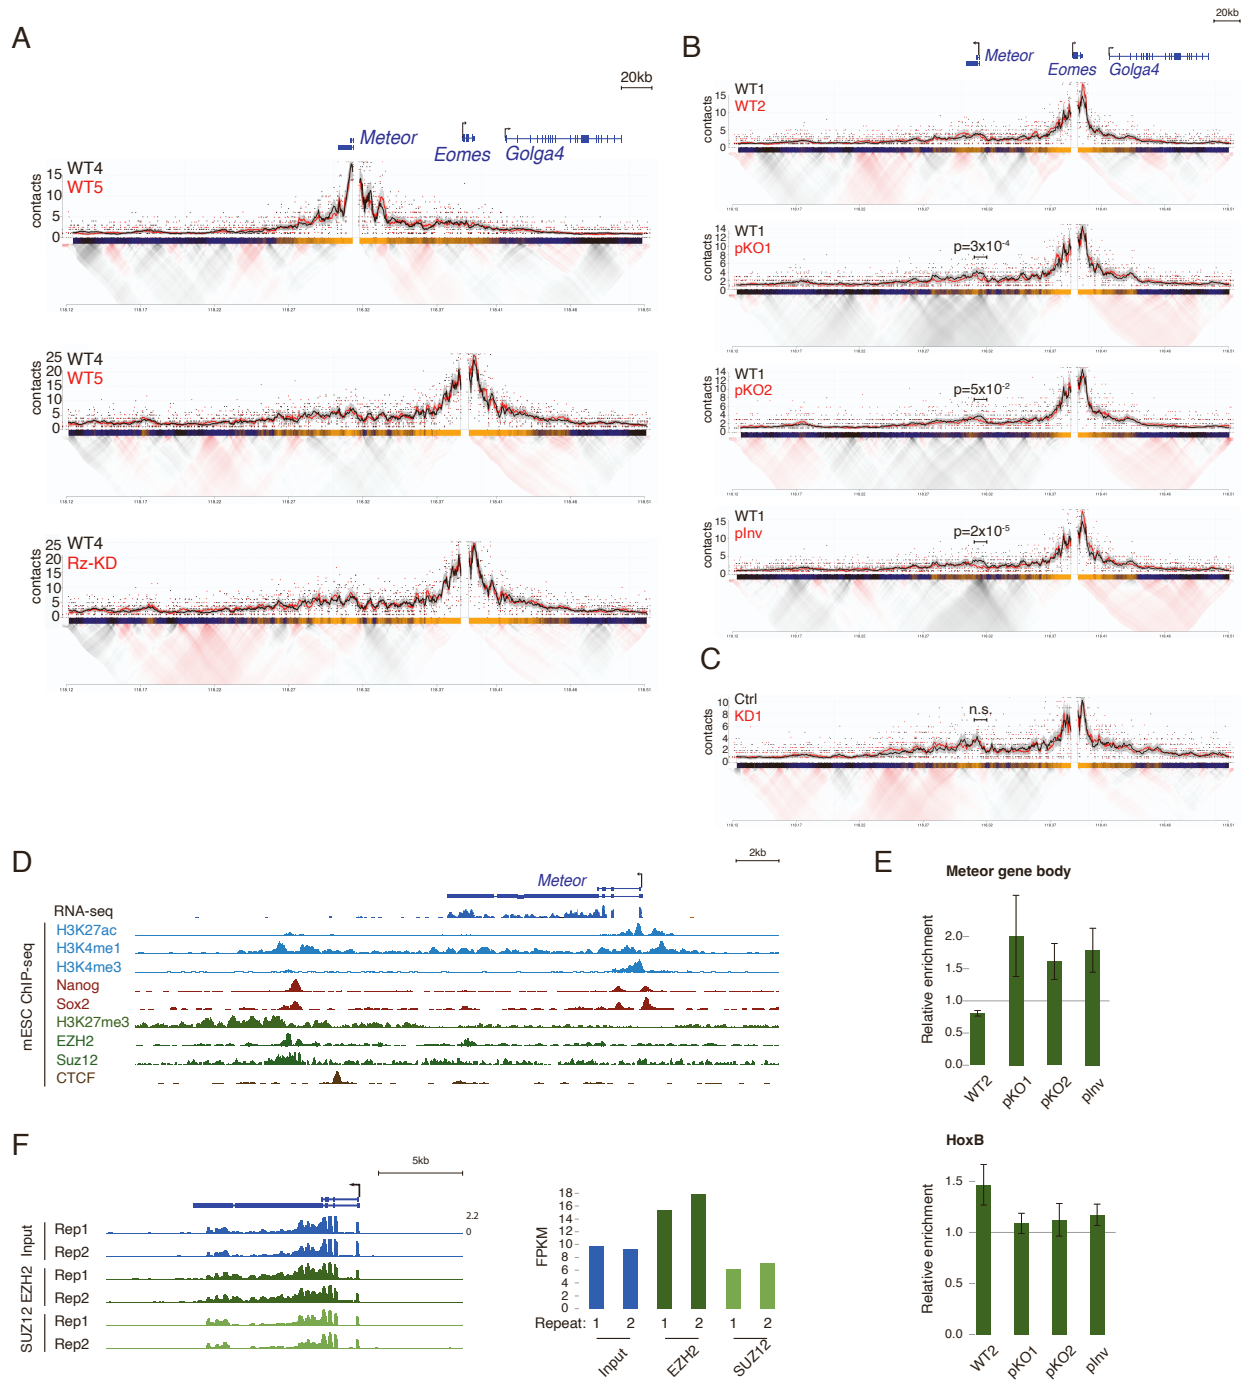

**Figure S2. *Meteor* depletion induces chromatin changes in mESCs. Related to Figure 2.**

**A.** 4C analysis in the indicated mESC lines using either the *Meteor* or *Eomes* promoters as viewpoints. Domainograms showing mean contact per fragment end for a series of window sizes are placed below smoothed trend lines and raw counts of the contact profiles. **B.** Same as (A), for *Meteor* pKO and plnv mESCs, using the *Eomes* promoter as the viewpoint. **C.** Same as (A), for *Meteor* KD mESCs, using the *Eomes* promoter as the viewpoint. **D.** Genome browser image of the *Meteor* locus. Shown are representative transcript models; RNA-seq tracks where orange denotes transcription on the plus strand

and blue denotes transcription on the minus strand; and mESC CHIP-seq tracks. **E.** Quantification of H3K27me3 Cut&Run levels in mESC lines grown in serum-free 2i/LIF conditions. Shown are H3K27me3 levels around the *Meteor* gene body, and at a control region around the *HoxB* locus. Signal was normalized to WT1 and to a H3K27me3-rich region near the *Ppib* gene (see **STAR Methods**). Bars represent standard errors; n=3. **F.** (Left) Genome browser shot of the *Meteor* locus, showing RNA immunoprecipitation (RIP) data of WT mESCs taken from [S7]. All tracks are normalized to the same scale. (Right) RSEM quantification of signal from the *Meteor* region in the same samples.

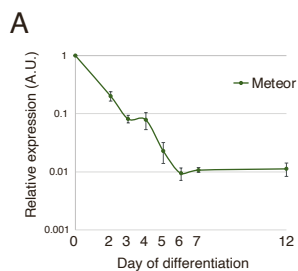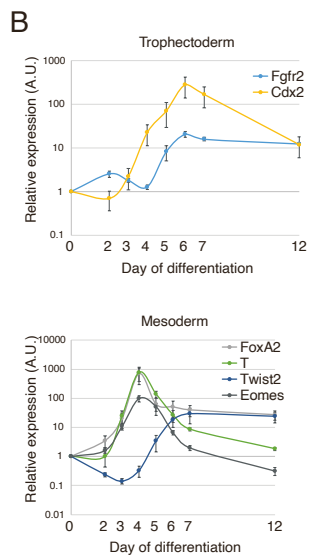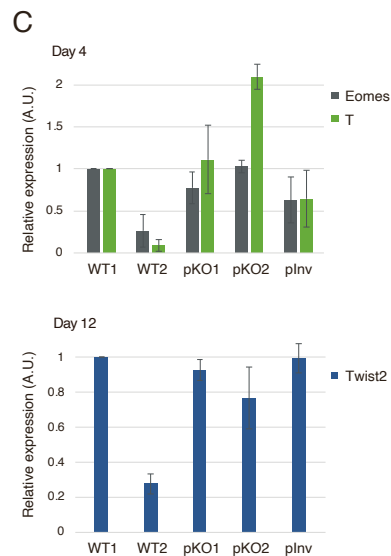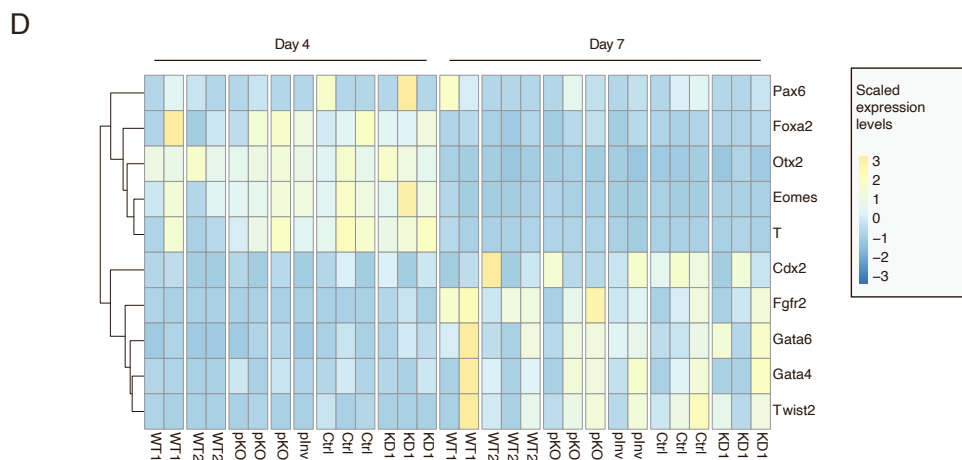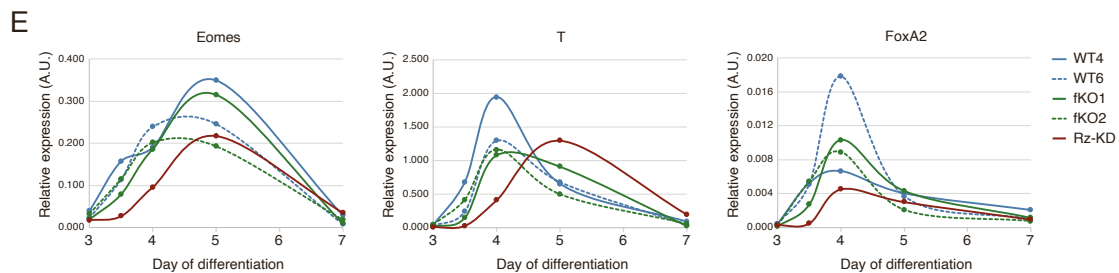

**Figure S3. *Meteor* repression does not alter the cardiac mesoderm differentiation potential of mESCs. Related to Figure 3.**

**A.** qRT-PCR quantifications of *Meteor* levels throughout EB differentiation. Levels were normalized to *Sdha* and to expression in mESCs (day 0). Bars represent standard errors; n=4. **B.** Same as (A), for the indicated markers of the different germ layers. **C.** qRT-PCR quantifications of the indicated mesoderm markers at day 4 (top) or day 12 (bottom) of EB differentiation of the indicated cell lines. Levels were normalized to *Sdha*. Bars represent standard errors; n=2. **D.** Heatmap of the scaled FPKM expression levels of the indicated genes in 3' RNA-seq data from the indicated day of EB differentiation. Each gene was scaled separately to mean 0 and standard deviation 1 across all the samples. **E.** qRT-PCR quantifications of the indicated markers at several time points throughout EB differentiation of the indicated cell lines. Levels were normalized to *Sdha*. n=2.

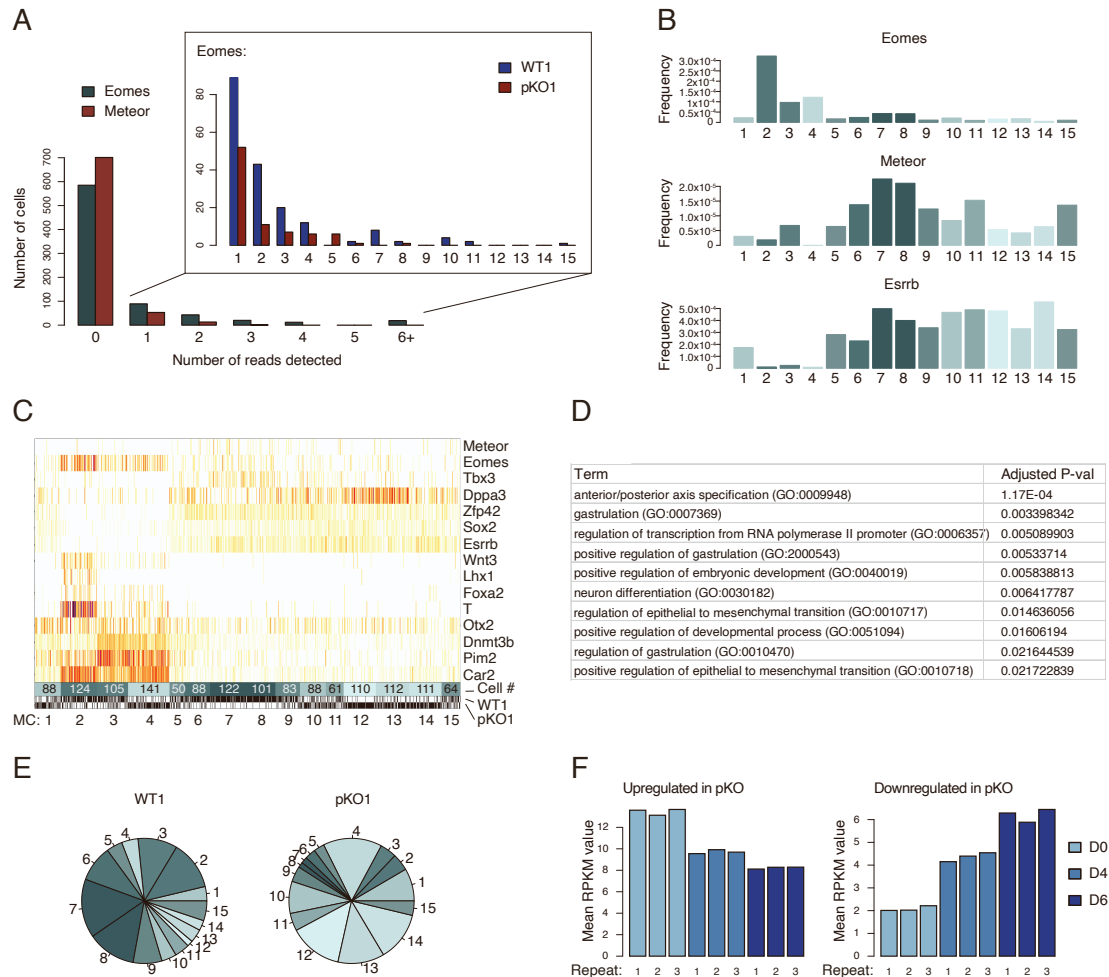

**Figure S4. Single-cell RNA-seq of WT and *Meteor* pKO cells. Related to Figure 4.**

**A.** Distribution of the number of unique reads per cell originating from the indicated transcript, for scRNA-seq of WT mESCs. Inset: same, for *Eomes* only, separately for WT and *Meteor* pKO cells, and showing only cells in which  $\geq 1$  *Eomes* reads were detected. **B.** Frequency of the indicated genes in each of the metacells (MCs). Color was assigned to each MC according to the ratio of WT and pKO cells that comprise it, with darker shades representing MCs comprised mostly of WT cells and lighter shades representing MCs comprised mostly of pKO cells. **C.** Heatmap showing enrichment values of the indicated key genes in individual cells (columns), grouped into MCs. Below: color assignments as in (B), overlaid with the number of cells in each MC; indication of the mESC line from which the cells originate; and MC number. **D.** GO terms associated with the 100 genes most highly correlated with *Eomes* in the scRNA-seq data. GO terms identified using Enrichr. **E.** Number of cells occupying the indicated MCs, separately for WT and pKO cells. Color assignments as in (B). **F.** Mean expression values of all the differentially regulated genes ( $FC \geq 1.5$  and  $padj < 0.05$  in bulk RNA-seq of both *Meteor* pKO1 and pKO2), separately for upregulated (left) and downregulated (right) genes, in different timepoints of a dataset of control mESCs undergoing neural differentiation taken from [S8]. D0: pluripotent mESCs; D4: multipotent progenitors; D6: early neural progenitors.



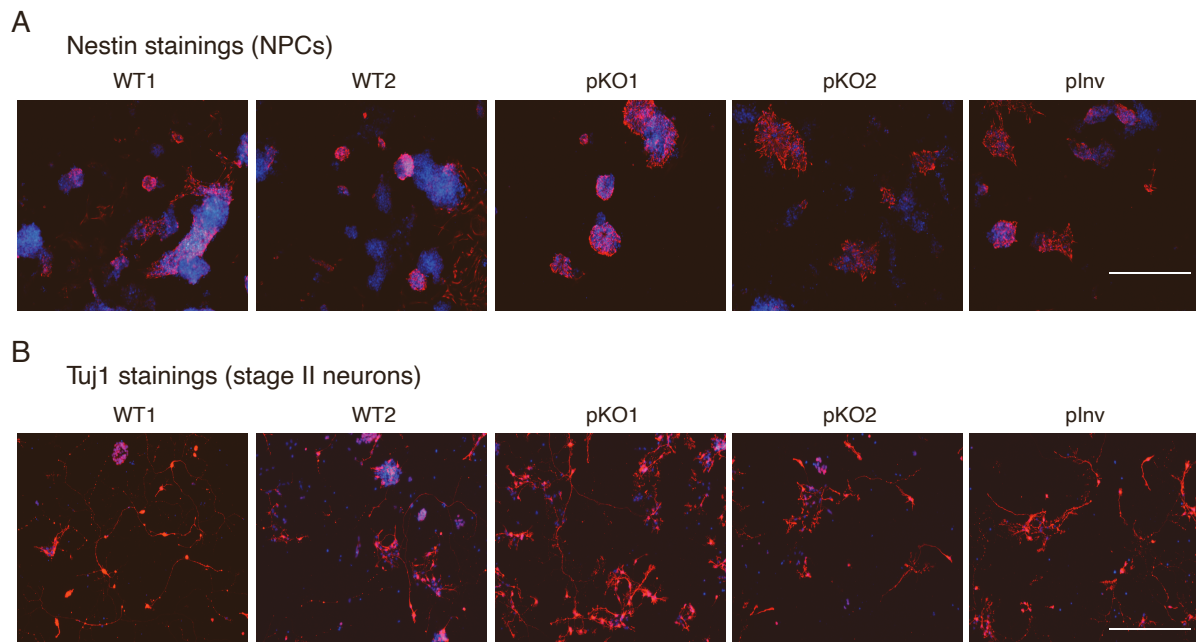

**Figure S5. Neuronal differentiation of WT and *Meteor*-depleted cell lines. Related to Figure 5.**

**A.** Nestin (red) stainings in NPCs derived from the indicated cell lines. Blue shows DAPI-colored nuclei. Scale bar = 400  $\mu$ m. **B.** Same as (A), for Tuj1 (red) stainings in stage II neurons.

**Table S1.** Sequences of oligonucleotide used in this study, related to STAR Methods.

| Purpose                                   | Name                      | Sequence                                                                                                                                                                                                            |
|-------------------------------------------|---------------------------|---------------------------------------------------------------------------------------------------------------------------------------------------------------------------------------------------------------------|
| 4C of <i>Meteor</i> promoter              | Upstream primer           | tggggtccgaggcagagaacgcga                                                                                                                                                                                            |
|                                           | Downstream primer         | aatgatacggcgaccaccgagatctacactctttccctacacga<br>cgctctccgatctagagacagaagaagtactatggc                                                                                                                                |
| 4C of <i>Meteor</i> promoter in pKO mESCs | Upstream primer           | tctaccagaagtgctaagggatg                                                                                                                                                                                             |
|                                           | Downstream primer         | aatgatacggcgaccaccgagatctacactctttccctacacga<br>cgctctccgatctgtaatctataaagtgcttgctata                                                                                                                               |
| 4C of <i>Eomes</i> promoter               | Upstream primer           | ctacctgtgcaaccggcccctatg                                                                                                                                                                                            |
|                                           | Downstream primer         | aatgatacggcgaccaccgagatctacactctttccctacacga<br>cgctctccgatcttcaaattccaccggcaccaaaactg                                                                                                                              |
| <i>Meteor</i> pKO                         | gRNA 1                    | aaaagctcggtagtaagagg                                                                                                                                                                                                |
|                                           | gRNA 2                    | gccgtgaacattattcgggg                                                                                                                                                                                                |
| <i>Meteor</i> pKO genotyping              | Primer A                  | aaattcagggtggcactctgct                                                                                                                                                                                              |
|                                           | Primer B                  | tgggcagataccaaccctct                                                                                                                                                                                                |
|                                           | Primer C                  | agatgcccacagccaaaact                                                                                                                                                                                                |
|                                           | Primer D                  | ggccaatcttgagtcttcgca                                                                                                                                                                                               |
| <i>Meteor</i> dCas9-KD                    | gRNA for KD1              | gagctcacggacatgagg                                                                                                                                                                                                  |
|                                           | gRNA for KD2              | gtccgaggcagagaacgcga                                                                                                                                                                                                |
| pAS cassette                              |                           | tttgggggtcctaggcaggggcttcagaggtgcttgccactgct<br>tggcaccctccccgactcgattgtacgtgaagctccccctcc<br>ccccgatcaagcacacaaaaaccaacacacagatctaatagaa<br>aataaagatcttttattcgggcagtaagtgtctcagctccattca<br>gactgtgaccttggcatgggc |
| <i>Meteor</i> pAS genotyping              | Forward primer            | atcattgctcattcatttga                                                                                                                                                                                                |
|                                           | Reverse primer            | tgggttatcgacagggaagt                                                                                                                                                                                                |
| <i>Meteor</i> PGK pEX cloning             | <i>Meteor</i> Insertion F | gtaatacgaactcactatagggcgaattggttgatttctgacct<br>cctg                                                                                                                                                                |
|                                           | <i>Meteor</i> Insertion R | tgcttatgcatagtgacttcttctgtctcggccgcgcttc<br>g                                                                                                                                                                       |
|                                           | Hygromycin F              | gagctcggttcccaggcttgggatgaaaaagcctgaactcacc                                                                                                                                                                         |
|                                           | Hygromycin R              | tccttcggttctctgctcggccatagagcccaccgcat                                                                                                                                                                              |
|                                           | PGK F                     | ccgaggcagagaacgcaaggaaggggtaggggagg                                                                                                                                                                                 |
|                                           | PGK R                     | tagtgacttcttctgtctcgaaggccggagatgagg                                                                                                                                                                                |
| <i>Meteor</i> PGK pEX                     | gRNA pEX                  | caagcctgggaaccgagctc                                                                                                                                                                                                |
| <i>Meteor</i> pEX genotyping              | Forward primer            | atacagggtcgccaacatct                                                                                                                                                                                                |
|                                           | Reverse primer            | cttgggaaaagcgctcccc                                                                                                                                                                                                 |
| qRT-PCR of <i>Meteor</i>                  | Forward primer            | aggactggcctgtagagaa                                                                                                                                                                                                 |
|                                           | Reverse primer            | agtcagacagagcatccatcc                                                                                                                                                                                               |

|                          |                |                         |
|--------------------------|----------------|-------------------------|
| qRT-PCR of <i>Eomes</i>  | Forward primer | tgtgacggcctacaaaaca     |
|                          | Reverse primer | tctgatgggatgaatcgtagtgt |
| qRT-PCR of <i>Fgfr2</i>  | Forward primer | aaagaccacaaatgggcgac    |
|                          | Reverse primer | ccacattaacaccccgaagga   |
| qRT-PCR of <i>Cdx2</i>   | Forward primer | gcggctggagctggagaaggagt |
|                          | Reverse primer | cggcggctgtggaggctgttgt  |
| qRT-PCR of <i>Gata4</i>  | Forward primer | agctccatgtcccagacattc   |
|                          | Reverse primer | agatgcatagccttgtgggg    |
| qRT-PCR of <i>Gata6</i>  | Forward primer | gacggcaccggtcattacc     |
|                          | Reverse primer | acagttggcacaggacagtcc   |
| qRT-PCR of <i>FoxA2</i>  | Forward primer | ggagccccgagggtactct     |
|                          | Reverse primer | gagcccgcgtcatgtt        |
| qRT-PCR of <i>T</i>      | Forward primer | gctctaaggaaccaccggtcatc |
|                          | Reverse primer | atgggactgcagcatggacag   |
| qRT-PCR of <i>Twist2</i> | Forward primer | gtctcagctacgccttctcc    |
|                          | Reverse primer | caggtgggtcctggcttg      |
| qRT-PCR of <i>Pax6</i>   | Forward primer | gggaccacttcaacaggact    |
|                          | Reverse primer | cgaggccagtactgagacat    |
| qRT-PCR of <i>Otx2</i>   | Forward primer | aagaccgggtaccagacatc    |
|                          | Reverse primer | ttggcggcacttagctcttc    |
| qRT-PCR of <i>Sdha</i>   | Forward primer | gctcctgcctctgtggttga    |
|                          | Reverse primer | agcaacaccgatgagcctg     |
| qRT-PCR of <i>Ppib</i>   | Forward primer | tgatccagggtggagacttc    |
|                          | Reverse primer | attggtgtctttgcctgcat    |

## References

- [S1] Tuck AC, Natarajan KN, Rice GM, Borawski J, Mohn F, Rankova A, et al. Distinctive features of lincRNA gene expression suggest widespread RNA-independent functions. *Life Sci Alliance* 2018;1:e201800124.
- [S2] Engreitz JM, Haines JE, Perez EM, Munson G, Chen J, Kane M, et al. Local regulation of gene expression by lincRNA promoters, transcription and splicing. *Nature* 2016;539:452–5.
- [S3] Alexanian M, Maric D, Jenkinson SP, Mina M, Friedman CE, Ting C-C, et al. A transcribed enhancer dictates mesendoderm specification in pluripotency. *Nat Commun* 2017;8:1806.
- [S4] Guo X, Xu Y, Wang Z, Wu Y, Chen J, Wang G, et al. A Linc1405/Eomes Complex Promotes Cardiac Mesoderm Specification and Cardiogenesis. *Cell Stem Cell* 2018;22:893–908.e6.
- [S5] Kolodziejczyk AA, Kim JK, Tsang JCH, Ilicic T, Henriksson J, Natarajan KN, et al. Single Cell RNA-Sequencing of Pluripotent States Unlocks Modular Transcriptional Variation. *Cell Stem Cell* 2015;17:471–85.
- [S6] Castro-Mondragon JA, Riudavets-Puig R, Rauluseviciute I, Berhanu Lemma R, Turchi L, Blanc-Mathieu R, et al. JASPAR 2022: the 9th release of the open-access database of transcription factor binding profiles. *Nucleic Acids Res* 2022;50:D165–73.
- [S7] Garland W, Comet I, Wu M, Radzsheuskaya A, Rib L, Vitting-Seerup K, et al. A Functional Link between Nuclear RNA Decay and Transcriptional Control Mediated by the Polycomb Repressive Complex 2. *Cell Rep* 2019;29:1800–11.e6.
- [S8] Stryjewska A, Dries R, Pieters T, Verstappen G, Conidi A, Coddens K, et al. Zeb2 Regulates Cell Fate at the Exit from Epiblast State in Mouse Embryonic Stem Cells. *Stem Cells* 2017;35:611–25.
